# Supplementary material
Source: PubMed Central journal article supplement (PMC4945409)
Supplement: NIHMS778056-supplement-supp_info.pdf [file NIHMS778056-supplement-supp_info.pdf]

## Protein Sequences

Tags and linkers underlined, mutations **bolded**, and fusions in respective colors.

### >>1wa3

MHHHHHHGGMKMEELFKKHKIVAVLRANSVEEAKKALAVFEGGVHLIEITFTVPDADTVIKELSFLKEKGAIIGAGTV  
TSVEQCRKAVESGAEFIVSPHLDEEISQFCKEKGVFYMPGVMTPTLVKAMKLGHTILKLFPGEVVGPQFVKAMKGFPP  
NVKFPVPTGGVNLNDNVCEWFKAGVLAVGVGSALVKGTPDEVREKAKAFVEKIRGCTE

### >>I3-01

MHHHHHHGGSGSGSGSGSMKMEELFKKHKIVAVLRANSVEEAKKALAVFLGGVHLIEITFTVPDADTVIKELSFLKE  
**MGAI**IGAGTVTSVEQCRKAVESGAEFIVSPHLDEEISQFCKEKGVFYMPGVMTPTLVKAMKLGHTILKLFPGEVVGPQ  
FVKAMKGFPPNVKFPVPTGGVNLNDNVCEWFKAGVLAVGVGSALVKGTP**VEVAEKAKAFVEKIRGCTE**

### >>I3-01 (L33R)

MHHHHHHGGMKMEELFKKHKIVAVLRANSVEEAKKALAVFRGGVHLIEITFTVPDADTVIKELSFLKEMGAIIGAGTV  
TSVEQCRKAVESGAEFIVSPHLDEEISQFCKEKGVFYMPGVMTPTLVKAMKLGHTILKLFPGEVVGPQFVKAMKGFPP  
NVKFPVPTGGVNLNDNVCEWFKAGVLAVGVGSALVKGTPVEVAEKAKAFVEKIRGCTE

### >>I3-01 (K129A)

MHHHHHHGGSGSGSGSGSMKMEELFKKHKIVAVLRANSVEEAKKALAVFLGGVHLIEITFTVPDADTVIKELSFLKE  
MGAIIGAGTVTSVEQCRKAVESGAEFIVSPHLDEEISQFCKEKGVFYMPGVMTPTLVKAMKLGHTIL**AL**FPGEVVGPQ  
FVKAMKGFPPNVKFPVPTGGVNLNDNVCEWFKAGVLAVGVGSALVKGTPVEVAEKAKAFVEKIRGCTE

### >>T33-21 (12-mer)

**A:**MRITTKVGDKGSTRFLFGGEEVWKDSP<sup>I</sup>IEANGTLDELTSFIGEAKHYVDEEMKGILEEIQNDIYKIMGEIGSKGKIE  
GISEERIAWLLKLI<sup>L</sup>LRMEMVNLKSFVLPGGTLES<sup>A</sup>KLDVCRTIARRALRKVLTVTREFGIGAEAAAYLLALS<sup>D</sup>LLFLL  
ARVIEIEKNKLKEVRSGSGSGSSKGEELFTGVVPIILVELDGDVNGHKFSVRGEGEGDATNGKLT<sup>L</sup>K<sup>F</sup>ICTTGKLPVPWP  
TLVTT<sup>L</sup>TYGVQCFARYPDHMKQHDFFKSAMPEGYVQERTISFKDDGTYKTRAEVKFEGDTLVNRIELK<sup>G</sup>IDFKEDGNIL  
GHKLEYNFN<sup>S</sup>HNVYITADKQKNGIKANFKIRHNVEDGSVQLADHYQQNTPIGDGPVLLPDNHYLSTQSVLSKDPNEKRD  
HMVLL<sup>E</sup>FVTAAGITHGMDELY  
**B:**M<sup>P</sup>HLVIEATANLRLETSPGELLEQANKALFASGQFGEADIKSRFVTLEAYRQGTAAVERAYLHACLSILDGRDIATR  
TLGASLCAVLAEAVAGGGE<sup>E</sup>GVQVSVEVREMERLSYAKRVVARQRLEHHHHHH

### >>T33-21 (24-mer)

**A:**MRITTKVGDKGSTRFLFGGEEVWKDSP<sup>I</sup>IEANGTLDELTSFIGEAKHYVDEEMKGILEEIQNDIYKIMGEIGSKGKIE  
GISEERIAWLLKLI<sup>L</sup>LRMEMVNLKSFVLPGGTLES<sup>A</sup>KLDVCRTIARRALRKVLTVTREFGIGAEAAAYLLALS<sup>D</sup>LLFLL  
ARVIEIEKNKLKEVRSGSGSGSSKGEELFTGVVPIILVELDGDVNGHKFSVRGEGEGDATNGKLT<sup>L</sup>K<sup>F</sup>ICTTGKLPVPWP  
TLVTT<sup>L</sup>TYGVQCFARYPDHMKQHDFFKSAMPEGYVQERTISFKDDGTYKTRAEVKFEGDTLVNRIELK<sup>G</sup>IDFKEDGNIL  
GHKLEYNFN<sup>S</sup>HNVYITADKQKNGIKANFKIRHNVEDGSVQLADHYQQNTPIGDGPVLLPDNHYLSTQSVLSKDPNEKRD  
HMVLL<sup>E</sup>FVTAAGITHGMDELY  
**B:**M<sup>P</sup>HLVIEATANLRLETSPGELLEQANKALFASGQFGEADIKSRFVTLEAYRQGTAAVERAYLHACLSILDGRDIATR  
TLGASLCAVLAEAVAGGGE<sup>E</sup>GVQVSVEVREMERLSYAKRVVARQRSKGEELFTGVVPIILVELDGDVNGHKFSVRGEGE

GDATNGKLTLLKFICTTGKLPVPWPTLVTTTLYGVQCFARYPDHMKQHDFFKSAMPEGYVQERTISFKDDGTYKTRAEVK  
FEGDTLVNRIELKGIIDFKEDGNILGHKLEYNFNHSHNVYITADKQKNGIKANFKIRHNVEDGSQLADHYQQNTPIGDGP  
VLLPDNHYLSTQSVLSKDPNEKRDMVLLLEFVTAAGITHGMDELYLEHHHHHH

>>I3-01 (ntGFP, 60-mer)

MHHHHHGGSSKGEELFTGVVPIILVELDGDVNGHKFSVRGEGEGDATNGKLTLLKFICTTGKLPVPWPTLVTTTLYGVQCF  
ARYPDHMKQHDFFKSAMPEGYVQERTISFKDDGTYKTRAEVKFEGDTLVNRIELKGIIDFKEDGNILGHKLEYNFNHSHNV  
YITADKQKNGIKANFKIRHNVEDGSQLADHYQQNTPIGDGPVLLPDNHYLSTQSVLSKDPNEKRDMVLLLEFVTAAGI  
THGMDELYGGSSGGSSGGSSMKMEELFKKKHIVAVLRANSVEEAKKALAVFLGGVHLIEITFTVPDADTVIKELSFLK  
EMGAIIGAGTVTSVEQCRKAVESGAEFIVSPHLDEEISQFCKEKGVFYMPGVMPTPELVKAMKLGHTILKLPGEVVG  
QFVKAMKGFPPNVKVFVPTGGVNLNDVCEWFKAGVLAVGVGSALVKGTPVEVAEKAKAFVEKIRGCTE

>>I3-01 (ctGFP, 60-mer)

MHHHHHGGSSGGSSGGSSMKMEELFKKKHIVAVLRANSVEEAKKALAVFLGGVHLIEITFTVPDADTVIKELSFLKE  
MGAIIGAGTVTSVEQCRKAVESGAEFIVSPHLDEEISQFCKEKGVFYMPGVMPTPELVKAMKLGHTILKLPGEVVG  
FVKAMKGFPPNVKVFVPTGGVNLNDVCEWFKAGVLAVGVGSALVKGTPVEVAEKAKAFVEKIRGCTEGSGSGSGSSK  
EELFTGVVPIILVELDGDVNGHKFSVRGEGEGDATNGKLTLLKFICTTGKLPVPWPTLVTTTLYGVQCFARYPDHMKQHDF  
FKSAMPEGYVQERTISFKDDGTYKTRAEVKFEGDTLVNRIELKGIIDFKEDGNILGHKLEYNFNHSHNVYITADKQKNGI  
ANFKIRHNVEDGSQLADHYQQNTPIGDGPVLLPDNHYLSTQSVLSKDPNEKRDMVLLLEFVTAAGITHGMDELY

>>I3-01 (nt/ctGFP, 120-mer)

MHHHHHGGSSKGEELFTGVVPIILVELDGDVNGHKFSVRGEGEGDATNGKLTLLKFICTTGKLPVPWPTLVTTTLYGVQCF  
ARYPDHMKQHDFFKSAMPEGYVQERTISFKDDGTYKTRAEVKFEGDTLVNRIELKGIIDFKEDGNILGHKLEYNFNHSHNV  
YITADKQKNGIKANFKIRHNVEDGSQLADHYQQNTPIGDGPVLLPDNHYLSTQSVLSKDPNEKRDMVLLLEFVTAAGI  
THGMDELYGGSSGGSSGGSSMKMEELFKKKHIVAVLRANSVEEAKKALAVFLGGVHLIEITFTVPDADTVIKELSFLK  
EMGAIIGAGTVTSVEQCRKAVESGAEFIVSPHLDEEISQFCKEKGVFYMPGVMPTPELVKAMKLGHTILKLPGEVVG  
QFVKAMKGFPPNVKVFVPTGGVNLNDVCEWFKAGVLAVGVGSALVKGTPVEVAEKAKAFVEKIRGCTEGSGSGSGSSK  
GEELFTGVVPIILVELDGDVNGHKFSVRGEGEGDATNGKLTLLKFICTTGKLPVPWPTLVTTTLYGVQCFARYPDHMKQHDF  
FKSAMPEGYVQERTISFKDDGTYKTRAEVKFEGDTLVNRIELKGIIDFKEDGNILGHKLEYNFNHSHNVYITADKQKNGI  
KANFKIRHNVEDGSQLADHYQQNTPIGDGPVLLPDNHYLSTQSVLSKDPNEKRDMVLLLEFVTAAGITHGMDELY

>>I3-01 (HB)

MHHHHHGGSSGGSSGGSSMKMEELFKKKHIVAVLRANSVEEAKKALAVFLGGVHLIEITFTVPDADTVIKELSFLKE  
MGAIIGAGTVTSVEQCRKAVESGAEFIVSPHLDEEISQFCKEKGVFYMPGVMPTPELVKAMKLGHTILKLPGEVVG  
FVKAMKGFPPNVKVFVPTGGVNLNDVCEWFKAGVLAVGVGSALVKGTPVEVAEKAKAFVEKIRGCTEGSGSGSGGTKEYEY  
DIEELRKKLKEQNKEMEKLKEELKKMEKLPKSPIAKLLILQMKLLLLQIENLQMQITMLEILSKR
